# Supplementary material for: Exploring the Mechanism of Wenshen Huatan Quyu Decotion for PCOS Based on Network Pharmacology and Molecular Docking Verification
Source: Hindawi journal article supplement (doi:10.1155/2022/3299091), 2022-08-28
Supplement: f1 [file 3299091.f1.pdf]

a

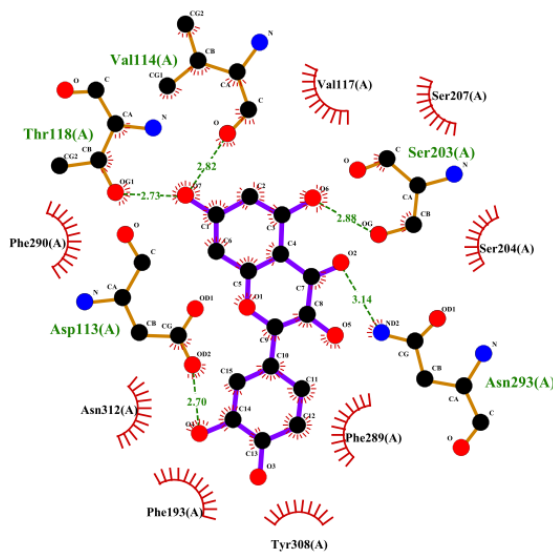

b

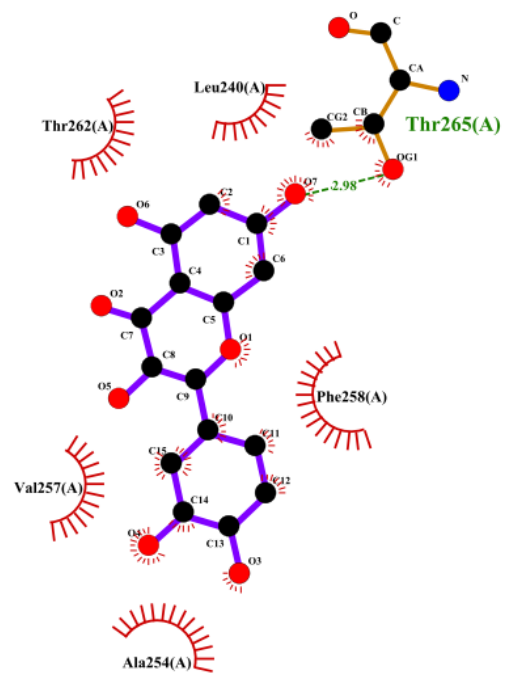

c

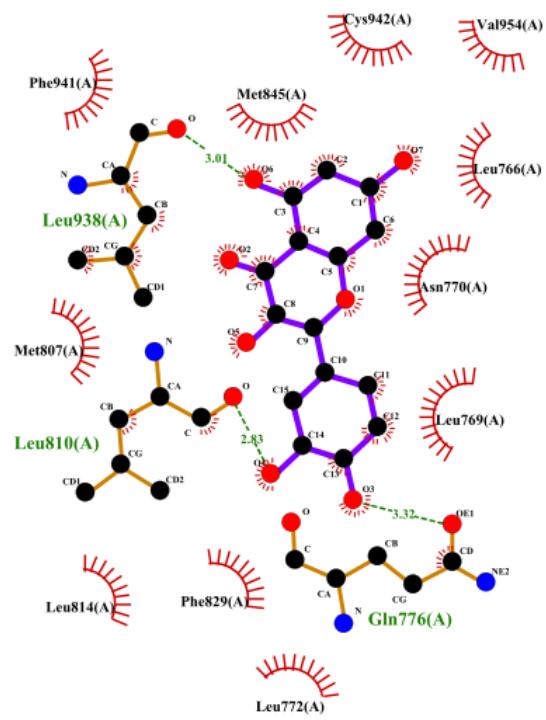

d

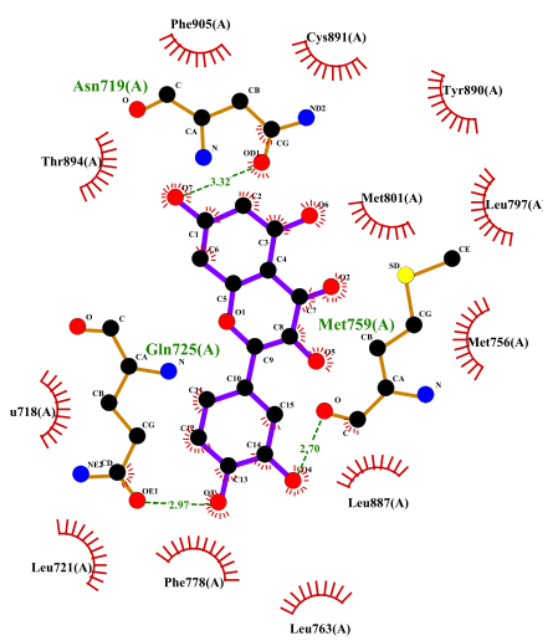

e

f

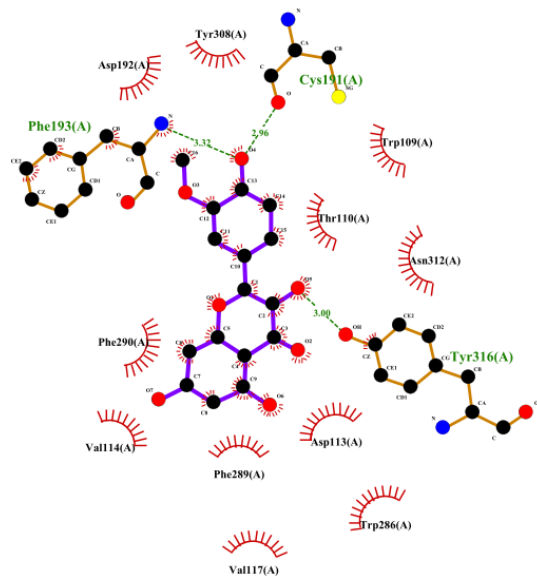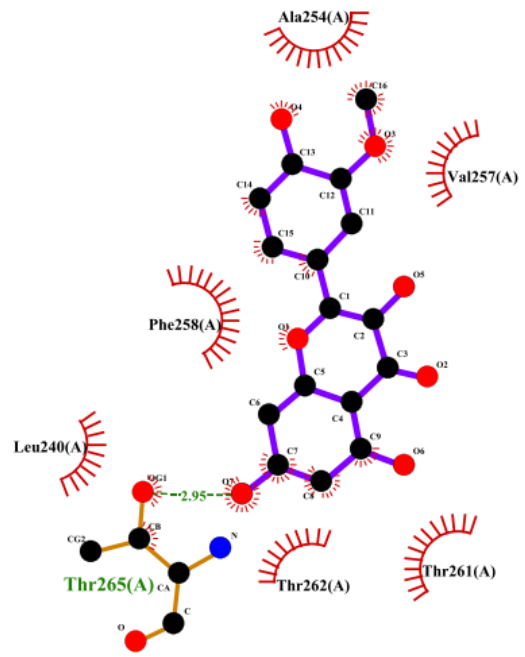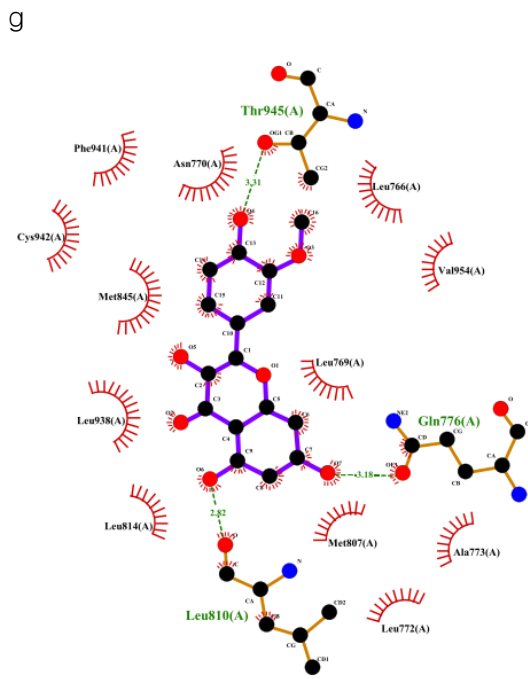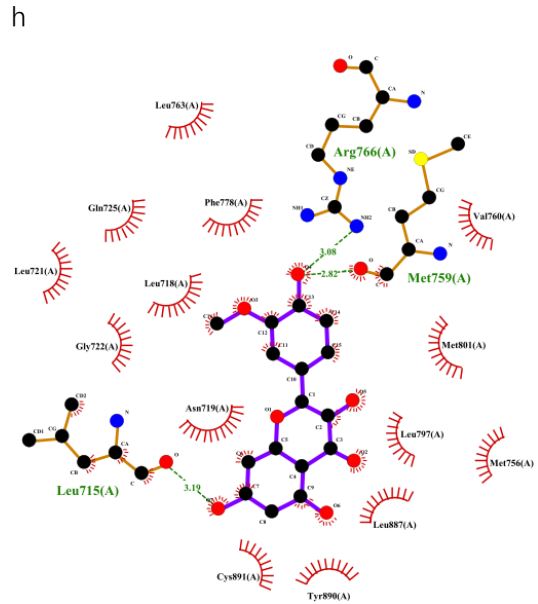

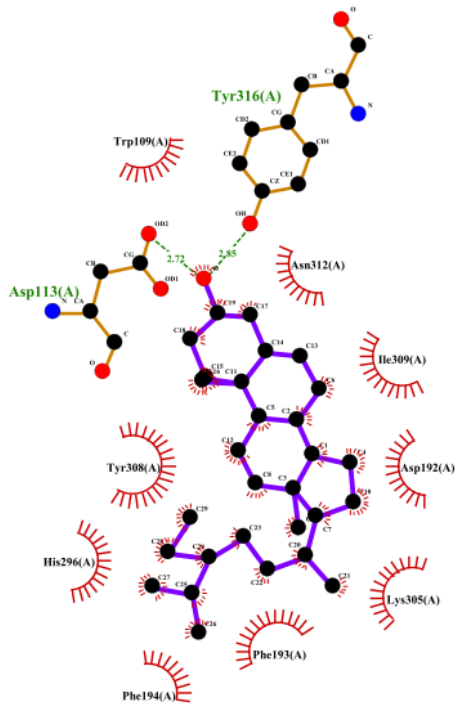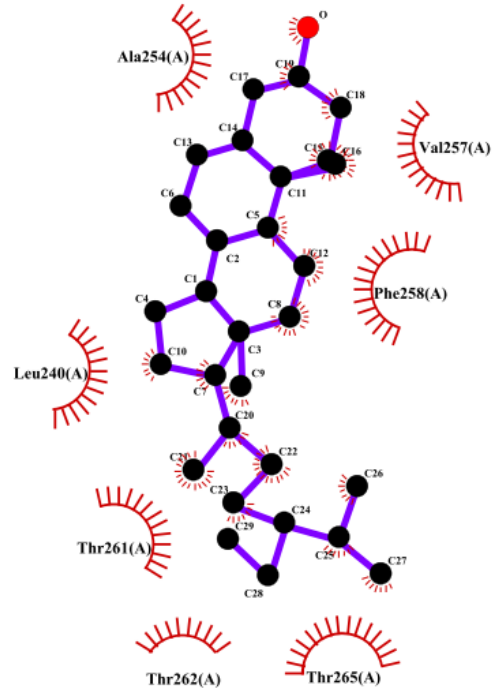

k

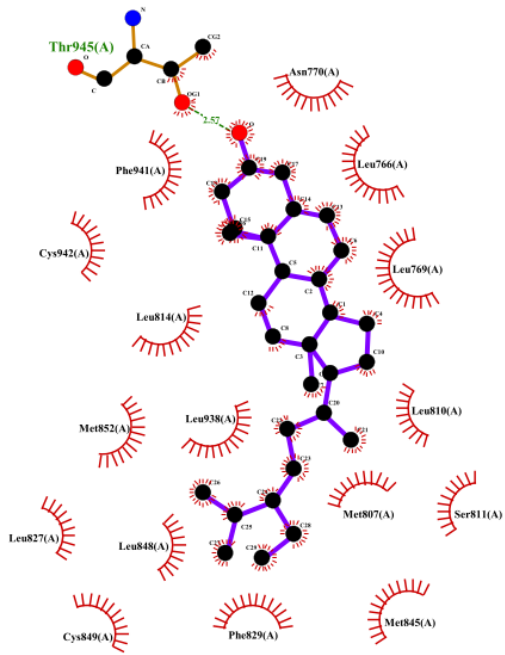

m

l

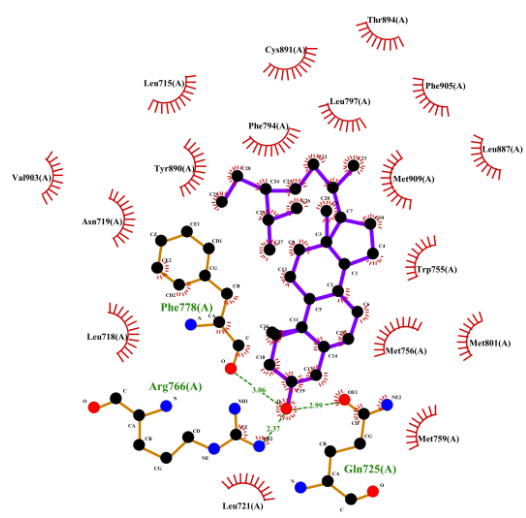

n

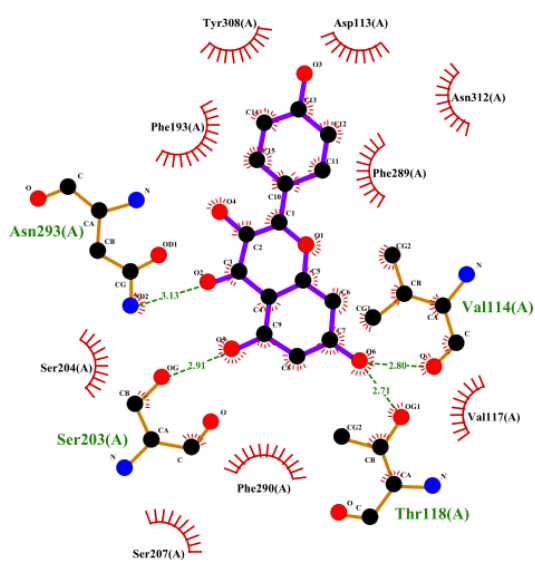

o

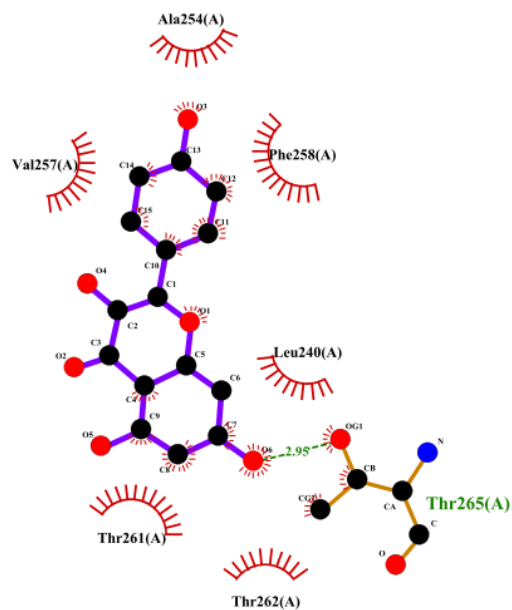

p

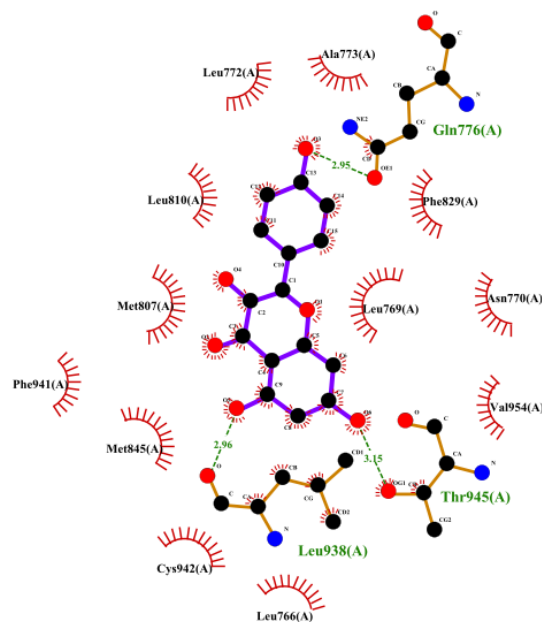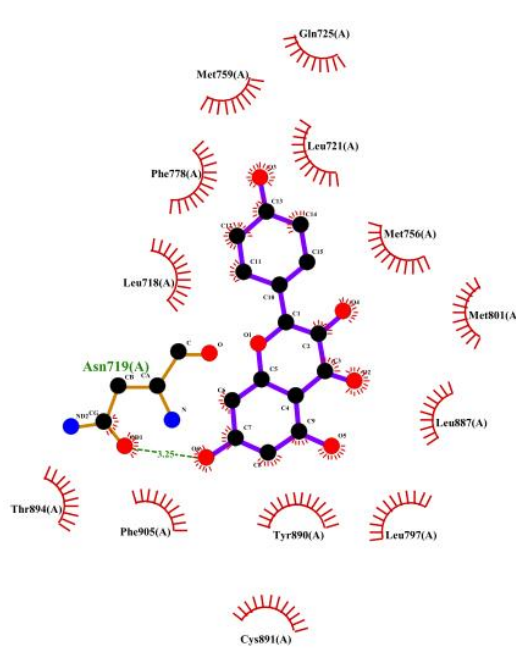

**Supplement 1:** a-d: MOL000098 bind to ADRB2, GABRA1, NR3C2, PGR; e-h: MOL000354 bind to ADRB2, GABRA1, NR3C2, PGR; i-l: MOL000358 bind to ADRB2, GABRA1, NR3C2, PGR; m-o: MOL000422 bind to ADRB2, GABRA1, NR3C2, PGR;
